# Supplementary material for: A large-scale study of ionic liquids employed in chemistry and energy research to reveal cytotoxicity mechanisms and to develop a safe design guide
Source: Royal Society of Chemistry journal article supplement (doi:10.1039/d1gc01520f), 2021-01-01
Supplement: d1gc01520f1.pdf [file d1gc01520f1.pdf]

**A large-scale study of ionic liquids employed in chemistry and energy research to reveal  
cytotoxicity mechanisms and to develop safe design guide**

Lilya U. Dzhemileva, Vladimir A. D'yakonov, Marina M. Seitkalieva, Natalia S.  
Kulikovskaya, Ksenia S. Egorova<sup>\*</sup>, and Valentine P. Ananikov<sup>\*</sup>

N.D. Zelinsky Institute of Organic Chemistry, Russian Academy of Sciences, Leninsky  
prospect 47, Moscow, Russia 119991

<sup>\*</sup>E-mail: egorova-ks@ioc.ac.ru, val@ioc.ac.ru

**Supporting Information**

**Table S1.** Dataset of cytotoxic activity of ILs measured in the present study.

| #     | Substance name                                                                                       | Mw, g·mol <sup>-1</sup> | Cell line     | 24-h CC <sub>50</sub> , mM    | Jurkat cells                    |                                          |                                 |                            |
|-------|------------------------------------------------------------------------------------------------------|-------------------------|---------------|-------------------------------|---------------------------------|------------------------------------------|---------------------------------|----------------------------|
|       |                                                                                                      |                         |               |                               | Apoptotic cells, % <sup>a</sup> | Mitochondrial damage, % <sup>a</sup> (%) | Cytochrome loss, % <sup>b</sup> | Dead cells, % <sup>a</sup> |
| 1     | 1-Ethyl-3-methylimidazolium chloride<br>C <sub>2</sub> MIm Cl                                        | 146.618                 | U937          | 110.31 (104.51-116.11)        | 5.69                            | 18.43                                    | 63.33                           | 68.17                      |
|       |                                                                                                      |                         | <b>Jurkat</b> | <b>102.14 (95.94-108.34)</b>  |                                 |                                          |                                 |                            |
|       |                                                                                                      |                         | HL60          | 33.17 (31.27-35.07)           |                                 |                                          |                                 |                            |
|       |                                                                                                      |                         | K562          | 143.22 (137.82-148.62)        |                                 |                                          |                                 |                            |
|       |                                                                                                      |                         | HEK293        | 393.37 (372.07-414.67)        |                                 |                                          |                                 |                            |
|       |                                                                                                      |                         | A549          | 188.18 (175.78-200.58)        |                                 |                                          |                                 |                            |
| A2780 | 187.41 (173.31-201.51)                                                                               |                         |               |                               |                                 |                                          |                                 |                            |
| 2     | 1-Ethyl-3-methylimidazolium acetate<br>C <sub>2</sub> MIm OAc                                        | 170.212                 | U937          | 150.88 (143.48-158.28)        | 1.35                            | 20.53                                    | 36.69                           | 0.60                       |
|       |                                                                                                      |                         | <b>Jurkat</b> | <b>146.76 (141.06-152.46)</b> |                                 |                                          |                                 |                            |
|       |                                                                                                      |                         | HL60          | 72.50 (70.00-75.00)           |                                 |                                          |                                 |                            |
|       |                                                                                                      |                         | K562          | 178.25 (170.15-186.35)        |                                 |                                          |                                 |                            |
|       |                                                                                                      |                         | HEK293        | 651.6 (605-698.2)             |                                 |                                          |                                 |                            |
|       |                                                                                                      |                         | A549          | 271.01 (249.61-292.41)        |                                 |                                          |                                 |                            |
| A2780 | 174.60 (159.1-190.1)                                                                                 |                         |               |                               |                                 |                                          |                                 |                            |
| 3     | 1-Ethyl-3-methylimidazolium bis(trifluoromethylsulfonyl)imide<br>C <sub>2</sub> MIm NTf <sub>2</sub> | 391.303                 | U937          | 6.13 (5.63-6.63)              | 6.49                            | 8.83                                     | 25.27                           | 2.75                       |
|       |                                                                                                      |                         | <b>Jurkat</b> | <b>4.64 (4.34-4.94)</b>       |                                 |                                          |                                 |                            |
|       |                                                                                                      |                         | HL60          | 3.07 (2.77-3.37)              |                                 |                                          |                                 |                            |
|       |                                                                                                      |                         | K562          | 6.64 (6.04-7.24)              |                                 |                                          |                                 |                            |
|       |                                                                                                      |                         | HEK293        | 13.19 (12.59-13.79)           |                                 |                                          |                                 |                            |
|       |                                                                                                      |                         | A549          | 4.3 (4.1-4.5)                 |                                 |                                          |                                 |                            |
| A2780 | 13.39 (12.49-14.29)                                                                                  |                         |               |                               |                                 |                                          |                                 |                            |
| 4     | 1-Ethyl-3-methylimidazolium tetrafluoroborate<br>C <sub>2</sub> MIm BF <sub>4</sub>                  | 197.972                 | U937          | 73.24 (69.84-76.64)           | 8.15                            | 27.15                                    | 40.88                           | 0.69                       |
|       |                                                                                                      |                         | <b>Jurkat</b> | <b>75.77 (72.97-78.57)</b>    |                                 |                                          |                                 |                            |
|       |                                                                                                      |                         | HL60          | 25.26 (23.76-26.76)           |                                 |                                          |                                 |                            |
|       |                                                                                                      |                         | K562          | 106.07 (101.47-110.67)        |                                 |                                          |                                 |                            |
|       |                                                                                                      |                         | HEK293        | 478.12 (444.92-511.32)        |                                 |                                          |                                 |                            |
| A549  | 151.23 (139.08-163.38)                                                                               |                         |               |                               |                                 |                                          |                                 |                            |

|   |                                                                                                      |         |               |                            |      |       |       |       |
|---|------------------------------------------------------------------------------------------------------|---------|---------------|----------------------------|------|-------|-------|-------|
|   |                                                                                                      |         | A2780         | 241.76 (239.54-243.98)     |      |       |       |       |
| 5 | 1-Methyl-3-propylimidazolium chloride<br>C <sub>3</sub> MIm Cl                                       | 160.645 | U937          | 93.37 (89.57-97.17)        | 3.91 | 7.05  | N/A   | 0.82  |
|   |                                                                                                      |         | <b>Jurkat</b> | <b>62.25 (59.05-65.45)</b> |      |       |       |       |
|   |                                                                                                      |         | HL60          | 31.13 (28.63-33.63)        |      |       |       |       |
|   |                                                                                                      |         | K562          | 124.49 (118.19-130.79)     |      |       |       |       |
|   |                                                                                                      |         | HEK293        | 342.23 (316.43-368.03)     |      |       |       |       |
|   |                                                                                                      |         | A549          | 101 (89.7-112.3)           |      |       |       |       |
|   |                                                                                                      |         | A2780         | 174.4 (162-186.8)          |      |       |       |       |
| 6 | 1-Butyl-3-methylimidazolium chloride<br>C <sub>4</sub> MIm Cl                                        | 174.672 | U937          | 57.25 (53.45-61.05)        | 5.67 | 6.54  | N/A   | 41.36 |
|   |                                                                                                      |         | <b>Jurkat</b> | <b>28.62 (24.92-32.32)</b> |      |       |       |       |
|   |                                                                                                      |         | HL60          | 14.31 (13.11-15.51)        |      |       |       |       |
|   |                                                                                                      |         | K562          | 85.87 (82.17-89.57)        |      |       |       |       |
|   |                                                                                                      |         | HEK293        | 322.38 (303.68-341.08)     |      |       |       |       |
|   |                                                                                                      |         | A549          | 185.61 (173.71-197.51)     |      |       |       |       |
|   |                                                                                                      |         | A2780         | 101.62 (91.52-111.72)      |      |       |       |       |
| 7 | 1-Butyl-3-methylimidazolium acetate<br>C <sub>4</sub> MIm OAc                                        | 198.266 | U937          | 32.78 (30.08-35.48)        | 8.26 | 99.85 | 87.93 | 43.43 |
|   |                                                                                                      |         | <b>Jurkat</b> | <b>37.82 (36.42-39.22)</b> |      |       |       |       |
|   |                                                                                                      |         | HL60          | 20.17 (19.07-21.27)        |      |       |       |       |
|   |                                                                                                      |         | K562          | 80.69 (77.29-84.09)        |      |       |       |       |
|   |                                                                                                      |         | HEK293        | 284.11 (264.21-304.01)     |      |       |       |       |
|   |                                                                                                      |         | A549          | 130.05 (117.95-142.15)     |      |       |       |       |
|   |                                                                                                      |         | A2780         | 123.58 (111.28-135.88)     |      |       |       |       |
| 8 | 1-Butyl-3-methylimidazolium bis(trifluoromethylsulfonyl)imide<br>C <sub>4</sub> MIm NTf <sub>2</sub> | 419.357 | U937          | 3.81 (3.01-4.61)           | 4.98 | 6.09  | N/A   | 1.84  |
|   |                                                                                                      |         | <b>Jurkat</b> | <b>2.38 (1.78-2.98)</b>    |      |       |       |       |
|   |                                                                                                      |         | HL60          | 1.90 (1.7-2.1)             |      |       |       |       |
|   |                                                                                                      |         | K562          | 5.24 (4.64-5.84)           |      |       |       |       |
|   |                                                                                                      |         | HEK293        | 21.70 (19.3-24.1)          |      |       |       |       |
|   |                                                                                                      |         | A549          | 13.10 (11.6-14.6)          |      |       |       |       |
|   |                                                                                                      |         | A2780         | 12.16 (11.06-13.26)        |      |       |       |       |
| 9 | 1-Butyl-3-methylimidazolium                                                                          | 226.026 | U937          | 31.18 (29.38-32.98)        | 8.11 | 18.76 | 30.02 | 40.64 |

|    |                                                                                        |         |               |                            |       |      |       |      |
|----|----------------------------------------------------------------------------------------|---------|---------------|----------------------------|-------|------|-------|------|
|    | tetrafluoroborate<br>C <sub>4</sub> MIm BF <sub>4</sub>                                |         | <b>Jurkat</b> | <b>23.11 (21.61-24.61)</b> |       |      |       |      |
|    |                                                                                        |         | HL60          | 7.04 (5.84-8.24)           |       |      |       |      |
|    |                                                                                        |         | K562          | 41.24 (38.84-43.64)        |       |      |       |      |
|    |                                                                                        |         | HEK293        | 148.15 (126.55-169.75)     |       |      |       |      |
|    |                                                                                        |         | A549          | 136.60 (125.00-148.2)      |       |      |       |      |
|    |                                                                                        |         | A2780         | 114.47 (103.57-125.37)     |       |      |       |      |
| 10 | 1-Hexyl-3-methylimidazolium<br>chloride<br>C <sub>6</sub> MIm Cl                       | 202.726 | U937          | 9.76 (8.96-10.56)          | 3.09  | 3.59 | N/A   | 1.36 |
|    |                                                                                        |         | <b>Jurkat</b> | <b>5.13 (4.73-5.53)</b>    |       |      |       |      |
|    |                                                                                        |         | HL60          | 1.23 (1.14-1.32)           |       |      |       |      |
|    |                                                                                        |         | K562          | 7.39 (6.69-8.09)           |       |      |       |      |
|    |                                                                                        |         | HEK293        | 16.76 (14.88-18.64)        |       |      |       |      |
|    |                                                                                        |         | A549          | 17.87 (16.67-19.07)        |       |      |       |      |
|    |                                                                                        |         | A2780         | 11.9 (10.6-13.2)           |       |      |       |      |
| 11 | 1-Hexyl-3-methylimidazolium<br>tetrafluoroborate<br>C <sub>6</sub> MIm BF <sub>4</sub> | 254.08  | U937          | 3.94 (3.64-4.24)           | 5.56  | 4.75 | N/A   | 0.66 |
|    |                                                                                        |         | <b>Jurkat</b> | <b>4.26 (3.86-4.66)</b>    |       |      |       |      |
|    |                                                                                        |         | HL60          | 1.57 (1.37-1.77)           |       |      |       |      |
|    |                                                                                        |         | K562          | 7.08 (6.38-7.78)           |       |      |       |      |
|    |                                                                                        |         | HEK293        | 27.25 (24.75-29.75)        |       |      |       |      |
|    |                                                                                        |         | A549          | 14.8 (13.36-16.24)         |       |      |       |      |
|    |                                                                                        |         | A2780         | 12.38 (11.3-13.46)         |       |      |       |      |
| 12 | 1-Methyl-3-octylimidazolium<br>tetrafluoroborate<br>C <sub>8</sub> MIm BF <sub>4</sub> | 282.134 | U937          | 0.35 (0.3-0.4)             | 8.17  | 6.29 | 24.51 | 1.19 |
|    |                                                                                        |         | <b>Jurkat</b> | <b>0.53 (0.46-0.6)</b>     |       |      |       |      |
|    |                                                                                        |         | HL60          | 0.07 (0.06-0.08)           |       |      |       |      |
|    |                                                                                        |         | K562          | 0.78 (0.69-0.87)           |       |      |       |      |
|    |                                                                                        |         | HEK293        | 2.14 (1.81-2.47)           |       |      |       |      |
|    |                                                                                        |         | A549          | 1.1 (1.01-1.19)            |       |      |       |      |
|    |                                                                                        |         | A2780         | 0.89 (0.81-0.97)           |       |      |       |      |
| 13 | 1-Decyl-3-methylimidazolium<br>chloride<br>C <sub>10</sub> MIm Cl                      | 258.834 | U937          | 0.04 (0.031-0.049)         | 16.71 | 3.03 | N/A   | 1.33 |
|    |                                                                                        |         | <b>Jurkat</b> | <b>0.08 (0.075-0.085)</b>  |       |      |       |      |
|    |                                                                                        |         | HL60          | 0.007 (0.006-0.008)        |       |      |       |      |
|    |                                                                                        |         | K562          | 0.081 (0.073-0.089)        |       |      |       |      |

|       |                                                                                                  |         |               |                            |       |       |       |       |
|-------|--------------------------------------------------------------------------------------------------|---------|---------------|----------------------------|-------|-------|-------|-------|
|       |                                                                                                  |         | HEK293        | 0.19 (0.174-0.206)         |       |       |       |       |
|       |                                                                                                  |         | A549          | 0.12 (0.109-0.131)         |       |       |       |       |
|       |                                                                                                  |         | A2780         | 0.93 (0.858-1.002)         |       |       |       |       |
| 14    | 1-Hexadecyl-3-methylimidazolium chloride<br>C <sub>16</sub> MIm Cl                               | 342.996 | U937          | 0.012 (0.01-0.014)         | 18.93 | 41.07 | 30.76 | 12.23 |
|       |                                                                                                  |         | <b>Jurkat</b> | <b>0.015 (0.013-0.017)</b> |       |       |       |       |
|       |                                                                                                  |         | HL60          | 0.003 (0.002-0.004)        |       |       |       |       |
|       |                                                                                                  |         | K562          | 0.007 (0.006-0.008)        |       |       |       |       |
|       |                                                                                                  |         | HEK293        | 0.045 (0.042-0.048)        |       |       |       |       |
|       |                                                                                                  |         | A549          | 0.022 (0.02-0.024)         |       |       |       |       |
| A2780 | 0.012 (0.011-0.013)                                                                              |         |               |                            |       |       |       |       |
| 15    | 1-(2-Hydroxyethyl)-3-methylimidazolium tetrafluoroborate<br>HOC <sub>2</sub> MIm BF <sub>4</sub> | 213.971 | U937          | 72.12 (68.72-75.52)        | 8.52  | 15.55 | 28.12 | 0.39  |
|       |                                                                                                  |         | <b>Jurkat</b> | <b>51.41 (48.91-53.91)</b> |       |       |       |       |
|       |                                                                                                  |         | HL60          | 64.10 (61.00-67.20)        |       |       |       |       |
|       |                                                                                                  |         | K562          | 74.78 (70.68-78.88)        |       |       |       |       |
|       |                                                                                                  |         | HEK293        | 128.45 (116.67-140.23)     |       |       |       |       |
|       |                                                                                                  |         | A549          | 125.39 (113.85-136.93)     |       |       |       |       |
| A2780 | 97.10 (89.97-104.23)                                                                             |         |               |                            |       |       |       |       |
| 16    | 1-Butylpyridinium chloride<br>C <sub>4</sub> Py Cl                                               | 171.668 | U937          | 96.12 (91.82-100.42)       | 3.96  | 6.57  | 79.36 | 0.93  |
|       |                                                                                                  |         | <b>Jurkat</b> | <b>37.86 (35.76-39.96)</b> |       |       |       |       |
|       |                                                                                                  |         | HL60          | 29.13 (26.93-31.33)        |       |       |       |       |
|       |                                                                                                  |         | K562          | 87.38 (83.78-90.98)        |       |       |       |       |
|       |                                                                                                  |         | HEK293        | 251.48 (226.78-276.18)     |       |       |       |       |
|       |                                                                                                  |         | A549          | 133.57 (120.24-146.9)      |       |       |       |       |
| A2780 | 118.31 (106.15-130.47)                                                                           |         |               |                            |       |       |       |       |
| 17    | 1-Butylpyridinium tetrafluoroborate<br>C <sub>4</sub> Py BF <sub>4</sub>                         | 223.022 | U937          | 17.94 (16.74-19.14)        | 6.63  | 92.20 | 40.58 | 1.53  |
|       |                                                                                                  |         | <b>Jurkat</b> | <b>22.42 (21.52-23.32)</b> |       |       |       |       |
|       |                                                                                                  |         | HL60          | 4.48 (4.08-4.88)           |       |       |       |       |
|       |                                                                                                  |         | K562          | 8.96 (8.26-9.66)           |       |       |       |       |
|       |                                                                                                  |         | HEK293        | 35.81 (32.53-39.09)        |       |       |       |       |
| A549  | 22.82 (20.86-24.78)                                                                              |         |               |                            |       |       |       |       |

|       |                                                                                          |         |               |                            |      |       |       |      |
|-------|------------------------------------------------------------------------------------------|---------|---------------|----------------------------|------|-------|-------|------|
|       |                                                                                          |         | A2780         | 20.62 (19.53-21.71)        |      |       |       |      |
| 18    | 1-Butyl-2-methylpyridinium chloride<br>C <sub>4</sub> M(2)Py Cl                          | 185.695 | U937          | 18.69 (16.97-20.41)        | 3.55 | 8.43  | 27.08 | 1.45 |
|       |                                                                                          |         | <b>Jurkat</b> | <b>29.62 (27.72-31.52)</b> |      |       |       |      |
|       |                                                                                          |         | HL60          | 13.46 (12.16-14.76)        |      |       |       |      |
|       |                                                                                          |         | K562          | 35.01 (32.51-37.51)        |      |       |       |      |
|       |                                                                                          |         | HEK293        | 93.38 (84.5-102.26)        |      |       |       |      |
|       |                                                                                          |         | A549          | 54.63 (49.64-59.62)        |      |       |       |      |
| A2780 | 47.18 (42.61-51.75)                                                                      |         |               |                            |      |       |       |      |
| 19    | 1-Butyl-3-methylpyridinium chloride<br>C <sub>4</sub> M(3)Py Cl                          | 185.695 | U937          | 10.77 (9.67-11.87)         | 5.20 | 11.57 | 25.06 | 2.79 |
|       |                                                                                          |         | <b>Jurkat</b> | <b>9.08 (8.28-9.88)</b>    |      |       |       |      |
|       |                                                                                          |         | HL60          | 4.13 (3.73-4.53)           |      |       |       |      |
|       |                                                                                          |         | K562          | 5.38 (4.68-6.08)           |      |       |       |      |
|       |                                                                                          |         | HEK293        | 21.08 (18.88-23.28)        |      |       |       |      |
|       |                                                                                          |         | A549          | 15.12 (13.66-16.58)        |      |       |       |      |
| A2780 | 12.81 (11.67-13.95)                                                                      |         |               |                            |      |       |       |      |
| 20    | 1-Butyl-1-methylpyrrolidinium chloride<br>C <sub>4</sub> C <sub>1</sub> Pyr Cl           | 177.716 | U937          | 41.20 (38.5-43.9)          | 7.23 | 16.31 | 74.03 | 0.59 |
|       |                                                                                          |         | <b>Jurkat</b> | <b>89.47 (85.57-93.37)</b> |      |       |       |      |
|       |                                                                                          |         | HL60          | 55.27 (51.97-58.57)        |      |       |       |      |
|       |                                                                                          |         | K562          | 119.54 (113.64-125.44)     |      |       |       |      |
|       |                                                                                          |         | HEK293        | 251.48 (227.33-275.63)     |      |       |       |      |
|       |                                                                                          |         | A549          | 140.05 (126.52-153.58)     |      |       |       |      |
| A2780 | 132.22 (119.24-145.2)                                                                    |         |               |                            |      |       |       |      |
| 21    | Tetraethylammonium tetrafluoroborate<br>(C <sub>2</sub> ) <sub>4</sub> N BF <sub>4</sub> | 217.059 | U937          | 13.16 (12.46-13.86)        | 3.66 | 6.25  | 25.57 | 1.13 |
|       |                                                                                          |         | <b>Jurkat</b> | <b>11.08 (10.18-11.98)</b> |      |       |       |      |
|       |                                                                                          |         | HL60          | 10.21 (9.61-10.81)         |      |       |       |      |
|       |                                                                                          |         | K562          | 14.62 (13.52-15.72)        |      |       |       |      |
|       |                                                                                          |         | HEK293        | 42.05 (38.38-45.72)        |      |       |       |      |
| A549  | 27.07 (24.08-31.99)                                                                      |         |               |                            |      |       |       |      |

|       |                                                                                          |         |               |                               |       |       |       |       |
|-------|------------------------------------------------------------------------------------------|---------|---------------|-------------------------------|-------|-------|-------|-------|
|       |                                                                                          |         | A2780         | 29.44 (26.79-32.09)           |       |       |       |       |
| 22    | Tetrabutylammonium chloride<br>(C <sub>4</sub> ) <sub>4</sub> N Cl                       | 277.921 | U937          | 8.99 (7.89-10.09)             | 1.95  | 9.48  | 27.41 | 0.74  |
|       |                                                                                          |         | <b>Jurkat</b> | <b>5.39 (4.69-6.09)</b>       |       |       |       |       |
|       |                                                                                          |         | HL60          | 1.79 (1.59-1.99)              |       |       |       |       |
|       |                                                                                          |         | K562          | 12.59 (11.39-13.79)           |       |       |       |       |
|       |                                                                                          |         | HEK293        | 25.34 (23.21-27.47)           |       |       |       |       |
|       |                                                                                          |         | A549          | 12.95 (11.81-14.09)           |       |       |       |       |
|       |                                                                                          |         | A2780         | 12.97 (11.82-14.12)           |       |       |       |       |
| 23    | Tetrabutylammonium tetrafluoroborate<br>(C <sub>4</sub> ) <sub>4</sub> N BF <sub>4</sub> | 329.275 | U937          | 8.54 (7.94-9.14)              | 4.69  | 22.07 | 39.20 | 0.59  |
|       |                                                                                          |         | <b>Jurkat</b> | <b>4.96 (4.56-5.36)</b>       |       |       |       |       |
|       |                                                                                          |         | HL60          | 2.23 (2.13-2.33)              |       |       |       |       |
|       |                                                                                          |         | K562          | 8.37 (7.77-8.97)              |       |       |       |       |
|       |                                                                                          |         | HEK293        | 27.52 (24.81-30.23)           |       |       |       |       |
|       |                                                                                          |         | A549          | 16.76 (15.48-18.04)           |       |       |       |       |
| A2780 | 11.65 (10.65-12.74)                                                                      |         |               |                               |       |       |       |       |
| 24    | Cholinium acetate<br>Chol OAc                                                            | 163.21  | U937          | 137.77 (130.87-144.67)        | 5.50  | 37.71 | 60.75 | 0.88  |
|       |                                                                                          |         | <b>Jurkat</b> | <b>153.09 (146.34-159.84)</b> |       |       |       |       |
|       |                                                                                          |         | HL60          | 100.40 (94.59-106.21)         |       |       |       |       |
|       |                                                                                          |         | K562          | 86.62 (82.94-90.3)            |       |       |       |       |
|       |                                                                                          |         | HEK293        | 256.15 (232.39-279.91)        |       |       |       |       |
|       |                                                                                          |         | A549          | 143.14 (127.96-158.32)        |       |       |       |       |
| A2780 | 149.1 (133.79-164.41)                                                                    |         |               |                               |       |       |       |       |
| 25    | Cholinium bis(trifluoromethylsulfonyl)imide<br>Chol NTf <sub>2</sub>                     | 384.308 | U937          | 7.24 (6.74-7.74)              | 7.66  | 13.64 | 44.32 | 1.15  |
|       |                                                                                          |         | <b>Jurkat</b> | <b>5.21 (4.81-5.61)</b>       |       |       |       |       |
|       |                                                                                          |         | HL60          | 3.12 (2.82-3.42)              |       |       |       |       |
|       |                                                                                          |         | K562          | 7.28 (6.78-7.78)              |       |       |       |       |
|       |                                                                                          |         | HEK293        | 24.33 (22.96-25.7)            |       |       |       |       |
|       |                                                                                          |         | A549          | 13.40 (12.16-14.64)           |       |       |       |       |
| A2780 | 15.15 (14.03-16.27)                                                                      |         |               |                               |       |       |       |       |
|       | Valinomycin                                                                              |         | Jurkat        | 0.002                         | 34.52 | 5.87  | N/A   | 25.36 |
|       | CCCP                                                                                     |         |               | 0.050                         | 17.37 | 92.20 | N/A   | 1.10  |
|       | Staurosporine                                                                            |         |               | 0.002                         | 63.74 | 70.34 | 30.82 | 0.24  |

|  |              |  |   |      |      |      |      |
|--|--------------|--|---|------|------|------|------|
|  | Living cells |  | - | 1.52 | 1.49 | 5.82 | 0.18 |
|--|--------------|--|---|------|------|------|------|

<sup>a</sup> Incubation time – 2 h.

<sup>b</sup> Incubation time – 4 h.

CC<sub>50</sub>, half-maximal cytotoxicity concentration; CCCP, carbonyl cyanide *m*-chlorophenyl hydrazone; N/A, data not available.
